# Supplementary material
Source: ML conference proceedings conference paper supplement (https://openaccess.thecvf.com/content/CVPR2026/html/He_Neighbor_GRPO_Contrastive_CVPR_2026_paper.html)
Supplement: Supplementary file 1 [file He_Neighbor_GRPO_Contrastive_CVPR_2026_supplemental.pdf]

# Supplementary Materials of Neighbor GRPO

## 1. Algorithm

We provide the pseudo-code for Neighbor GRPO in Algorithm 1. We suggest adopting a more efficient solver, such as DPM-Solver++, with fewer sampling timesteps  $T$  for the RolloutSolver to accelerate training. Compared with SDE-based GRPO methods, which call TrainSolver  $G \times K$  times in each GRPO iteration, our approach requires  $B \times K$  calls to TrainSolver. Note that we usually have  $B < G$ , which allows us to further reduce the training cost with Neighbor GRPO.

## 2. Derivation of the SDE Formulation

For a Rectified Flow model, the forward process from data  $x_0$  to noise  $\epsilon$  is  $x_t = (1-t)x_0 + t\epsilon$ . The reverse process follows the ODE  $\frac{dx_t}{dt} = v_\theta(x_t, t)$ , where  $v_\theta(x_t, t) \approx \epsilon - x_0$ .

To introduce stochasticity, we construct an equivalent SDE that shares the same marginal probability density  $p_t(x)$  for all  $t \in [0, 1]$ . A common choice is:

$$dx_t = \left[ v_\theta(x_t, t) + \frac{\eta_t^2}{2t} \hat{\epsilon}_\theta(x_t, t) \right] dt + \eta_t dw_t, \quad (1)$$

where  $dw_t$  is a standard Wiener process,  $\eta_t$  controls the noise intensity, and  $\hat{\epsilon}_\theta(x_t, t) = x_t + (1-t)v_\theta(x_t, t)$  is the estimated initial noise.

For numerical simulation, we discretize the reverse SDE. With a backward step  $\Delta t > 0$ , the update rule is:

$$x_{t-\Delta t} = x_t - \left[ v_\theta(x_t, t) + \frac{\eta_t^2}{2t} \hat{\epsilon}_\theta(x_t, t) \right] \Delta t + \eta_t \sqrt{\Delta t} \epsilon, \quad (2)$$

where  $\epsilon \sim \mathcal{N}(0, I)$ . Let's define the single-step ODE update as  $x_{t-\Delta t}^{(\text{ODE})} = x_t - v_\theta(x_t, t) \Delta t$ . Let  $\sigma_t^2 = \eta_t^2 \Delta t$ . The SDE update can be rewritten as:

$$x_{t-\Delta t}^{(\text{SDE})} = x_t - v_\theta(x_t, t) \Delta t - \frac{\sigma_t^2}{2t \Delta t} \hat{\epsilon}_\theta(x_t, t) \Delta t + \sigma_t \epsilon \quad (3)$$

$$= x_{t-\Delta t}^{(\text{ODE})} - \frac{\sigma_t^2}{2t} \hat{\epsilon}_\theta(x_t, t) + \sigma_t \epsilon. \quad (4)$$

This discretized update defines a Gaussian policy  $\pi_\theta(x_{t-\Delta t} | x_t, c) = \mathcal{N}(\mu_\theta, \sigma_t^2 I)$ , where the mean is

---

## Algorithm 1 Neighbor GRPO

---

**Require:** prompts  $C$ , parameters  $\theta$ ; group size  $G$ ; anchors per batch  $B$ ; number of rollout steps  $T$ ; number of train steps  $K$ ; time schedule  $\mathcal{T} = \{t_1, t_2, \dots, t_T\}$

**Ensure:**  $t_T = 1, t_1 = 0$

**for** iteration  $m = 1$  to  $M$  **do**

$\pi_{\theta_{\text{old}}} \leftarrow \pi_\theta$

Sample prompt  $c \in C$

Draw shared initial noise  $\epsilon^* \sim \mathcal{N}(0, I)$

**for**  $i = 1$  to  $G$  **do**

Draw  $\delta^{(i)} \sim \mathcal{N}(0, I)$

$x_1^{(i)} \leftarrow \sqrt{1 - \sigma^2} \epsilon^* + \sigma \delta^{(i)}$  ▷ Perturb noise.

**for**  $k = T$  to  $1$  **do**

$x_{t_{k-1}}^{(i)} \leftarrow \text{RolloutSolver.step}(x_{t_k}^{(i)}, c; \theta_{\text{old}})$

▷ Stop gradient.

**end for**

**end for**

Compute advantages  $\{A_i\}$

Sample  $B$  anchor indices  $S \subset \{1, \dots, G\}$

Sample  $K$  steps  $\mathcal{K} \subset \{1, 2, \dots, T-1\}$

**for**  $j \in S$  **do**

**for**  $k \in \mathcal{K}$  **do**

$x_{t_{k+1}}^{(\theta)} \leftarrow x_{t_k}^{(j)}$

$x_{t_k}^{(\theta)} \leftarrow \text{TrainSolver.step}(x_{t_{k+1}}^{(\theta)}, c; \theta)$

**for**  $i = 1$  to  $G$  **do**

$\pi_\theta^{(i)} \leftarrow \text{softmax}_i(-\|x_{t_k}^{(i)} - x_{t_k}^{(\theta)}\|_2^2)$

$\pi_{\theta_{\text{old}}}^{(i)} \leftarrow \text{softmax}_i(-\|x_{t_k}^{(i)} - x_{t_k}^{(j)}\|_2^2)$

$\rho^{(i|j)} \leftarrow \pi_\theta^{(i)} / \pi_{\theta_{\text{old}}}^{(i)}$

**end for**

Compute  $J = J(A, \rho; \theta)$

Accumulate gradients  $\nabla_\theta J$

**end for**

Update  $\theta$  using accumulated gradients

**end for**

**end for**

---

$\mu_\theta(x_t, t) = x_{t-\Delta t}^{(\text{ODE})} - \frac{\sigma_t^2}{2t} \hat{\epsilon}_\theta(x_t, t)$ . The negative log-likelihood of this policy is:

$$-\log \pi_\theta(x_{t-\Delta t} | x_t, c) = \frac{1}{2\sigma_t^2} \|x_{t-\Delta t} - \mu_\theta(x_t, t)\|_2^2 + \text{const.} \quad (5)$$

This provides the basis for the distance-based contrastive learning interpretation of SDE-based GRPO.

### 3. Derivation of the Drift Residual

The objective of GRPO is to maximize the expected log-likelihood of samples from the old policy  $\pi_{\theta_{\text{old}}}$  under the new policy  $\pi_{\theta}$ . This is equivalent to minimizing the negative log-likelihood:

$$\mathcal{L}(\theta) = \mathbb{E}_{x_{t-\Delta t} \sim \pi_{\theta_{\text{old}}}} [-\log \pi_{\theta}(x_{t-\Delta t})]. \quad (6)$$

From the SDE formulation in the previous section, the policy  $\pi_{\theta}$  is an isotropic Gaussian distribution  $\pi_{\theta}(x_{t-\Delta t}|x_t) = \mathcal{N}(\mu_{\theta}, \sigma_t^2 I)$ . The mean  $\mu_{\theta}$  and a sample from the old policy  $x_{t-\Delta t}^{(\text{SDE,old})}$  are given by:

$$\mu_{\theta} = x_{t-\Delta t}^{(\text{ODE},\theta)} - \frac{\sigma_t^2}{2t} \hat{\epsilon}_{\theta}(x_t, t), \quad (7)$$

$$x_{t-\Delta t}^{(\text{SDE,old})} = x_{t-\Delta t}^{(\text{ODE,old})} - \frac{\sigma_t^2}{2t} \hat{\epsilon}_{\theta_{\text{old}}}(x_t, t) + \sigma_t \epsilon, \quad (8)$$

where  $\epsilon \sim \mathcal{N}(0, I)$ , and the superscripts denote the policy parameters used for the ODE step and noise prediction.

The negative log-likelihood term, omitting constants, is a mean squared error (MSE):

$$-\log \pi_{\theta}(x_{t-\Delta t}^{(\text{SDE,old})}) = \frac{1}{2\sigma_t^2} \left\| x_{t-\Delta t}^{(\text{SDE,old})} - \mu_{\theta} \right\|_2^2. \quad (9)$$

Substituting the expressions for the mean and the sample, we get the term inside the norm:

$$\begin{aligned} & x_{t-\Delta t}^{(\text{SDE,old})} - \mu_{\theta} \\ &= \left( x_{t-\Delta t}^{(\text{ODE,old})} - \frac{\sigma_t^2}{2t} \hat{\epsilon}_{\theta_{\text{old}}} + \sigma_t \epsilon \right) - \left( x_{t-\Delta t}^{(\text{ODE},\theta)} - \frac{\sigma_t^2}{2t} \hat{\epsilon}_{\theta} \right) \\ &= \left( x_{t-\Delta t}^{(\text{ODE,old})} + \sigma_t \epsilon \right) - x_{t-\Delta t}^{(\text{ODE},\theta)} - \left( \frac{\sigma_t^2}{2t} \hat{\epsilon}_{\theta_{\text{old}}} - \frac{\sigma_t^2}{2t} \hat{\epsilon}_{\theta} \right). \end{aligned} \quad (10)$$

$$(11)$$

The main paper presents this MSE term in a simplified form:

$$\frac{1}{2\sigma_t^2} \left\| \tilde{x}_{t-\Delta t}^{(\text{ODE})} - x_{t-\Delta t}^{(\text{ODE})} + o_t(x_t) \right\|_2^2, \quad (12)$$

where  $\tilde{x}_{t-\Delta t}^{(\text{ODE})} = x_{t-\Delta t}^{(\text{ODE,old})} + \sigma_t \epsilon$  is the perturbed ODE sample from the old policy, and  $x_{t-\Delta t}^{(\text{ODE})}$  represents the ODE step from the new policy.

By comparing the two forms, we can identify the drift residual term  $o_t(x_t)$ :

$$o_t(x_t) = \frac{\sigma_t^2}{2t} \hat{\epsilon}_{\theta}(x_t, t) - \frac{\sigma_t^2}{2t} \hat{\epsilon}_{\theta_{\text{old}}}(x_t, t). \quad (13)$$

This term represents the drift correction between the old and new policies. As the policy update is constrained within a trust region,  $\theta \approx \theta_{\text{old}}$ , and this residual term approaches zero.

## 4. Marginal Distribution Preservation

Consider the standard flow matching framework with marginal distribution  $p_{\theta}(x_t)$  at timestep  $t \in [0, 1]$ , induced by the deterministic ODE flow  $\Phi_{1 \rightarrow t}(\cdot; \theta)$  starting from initial noise  $x_1$ :

$$p_{\theta}(x_t) = \mathbb{E}_{x_1 \sim \mathcal{N}(0; I)} [\delta(x_t - \Phi_{1 \rightarrow t}(x_1; \theta))], \quad (14)$$

where  $\delta(\cdot)$  is the Dirac delta function. We define a leaping probability  $\pi(x_t|x'_t) = \mathcal{N}(x_t|x'_t, \sigma_{\pi} I)$ , denoting the probability that any reachable latent sample  $x'_t = \Phi_{1 \rightarrow t}(x'_1; \theta)$  (derived from an initial noise  $x'_1$ ) leaps to  $x_t$ . Following this distribution, the marginal distribution of  $x_t$  leaped from any  $x'_t$  is

$$\pi(x_t) = \int p_{\theta}(x'_t) \pi(x_t|x'_t) dx'_t. \quad (15)$$

Given a sufficiently small  $\sigma_{\pi}$  (or as  $\sigma_{\pi} \rightarrow 0$ ), the support of  $\pi(x_t|x'_t)$  collapses to a single point where  $x'_t = x_t$ . Consequently,  $\pi(x_t) \rightarrow p_{\theta}(x_t)$ .

Now consider a Monte-Carlo approximation of  $\pi(x_t)$ :

$$\hat{\pi}(x_t) = \frac{1}{G} \sum_{i=1}^G \pi(x_t|x_t^{(i)}), \quad x_t^{(i)} \sim p_{\theta}(x_t). \quad (16)$$

Let  $\hat{\pi}(x_t^{(i)}) = \frac{1}{G}$ . We have:

$$\hat{\pi}(x_t^{(i)}|x_t) = \frac{\hat{\pi}(x_t^{(i)}) \hat{\pi}(x_t|x_t^{(i)})}{\hat{\pi}(x_t)} \quad (17)$$

$$= \frac{\pi(x_t|x_t^{(i)})}{\sum_{j=1}^G \pi(x_t|x_t^{(j)})} \quad (18)$$

$$= \frac{\exp(-\|x_t - x_t^{(i)}\|_2^2 / 2\sigma_{\pi}^2)}{\sum_j \exp(-\|x_t - x_t^{(j)}\|_2^2 / 2\sigma_{\pi}^2)}. \quad (19)$$

This formulation results in a softmax distribution with a temperature of  $2\sigma_{\pi}^2$ . In practice, we omit this temperature parameter because the Euclidean distance  $\|x_t - x_t^{(i)}\|_2^2$  is empirically large enough when  $i \neq j$ . Replacing  $x_t$  with  $x_t^{(\theta)}$  yields the surrogate leaping policy presented in the main paper. Maximizing this posterior probability  $\hat{\pi}(x_t^{(i)}|x_t^{(\theta)})$  encourages the generated sample to align closely with the support of the empirical marginal distribution defined by  $\{x_t^{(i)}\}_{i=1}^G$ . This serves as a tractable surrogate objective for marginal distribution preservation.

## 5. More Qualitative Results

We present more visualization results comparing different methods in Figure 1.

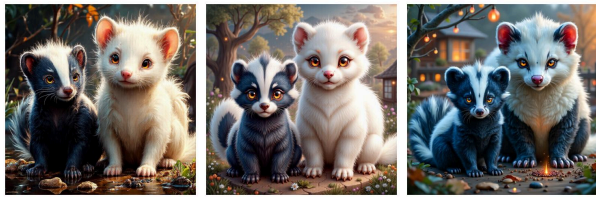

Two skunks - one small and dark blue with yellow eyes and a larger albino one with red eyes.

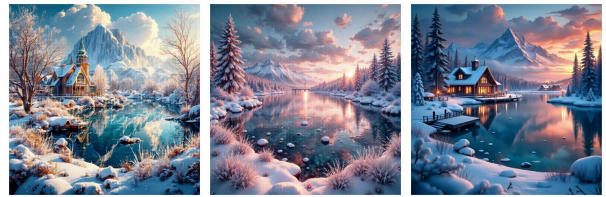

A snowy lake in Sweden captured in a vibrant, cinematic style with intense detail and raytracing technology showcased on Artstation.

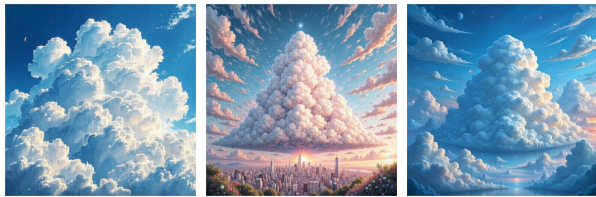

Anime-style vector illustration of a cloudy sky with a unique perspective.

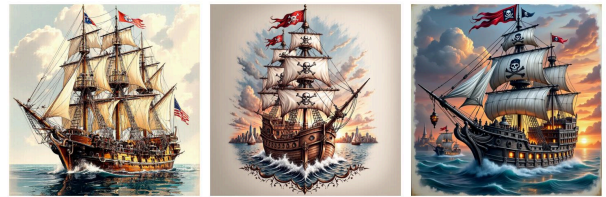

Realism tattoo design sketch of a pirate ship.

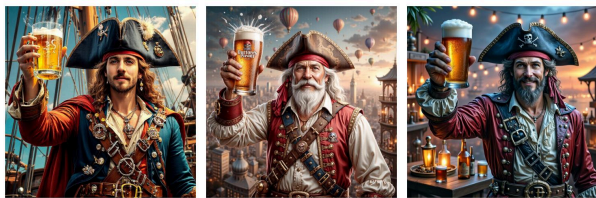

The image shows a pirate holding up a beer in celebration.

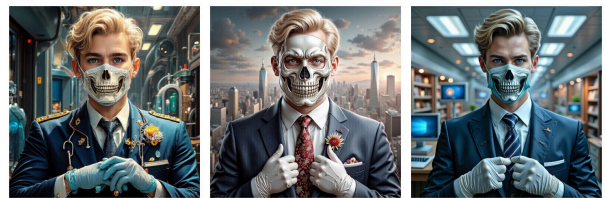

A blond person wearing a suit, medical gloves and a skull face mask is shown in a frontal portrait by Kim Kyoung Hwan.

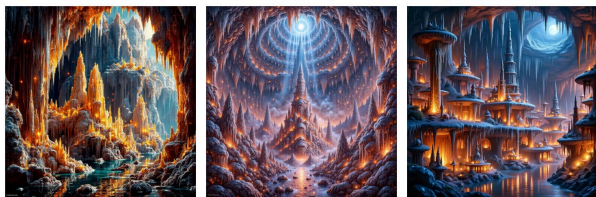

The image is of a massive cave interior filled with glowing stalactites and stalagmites.

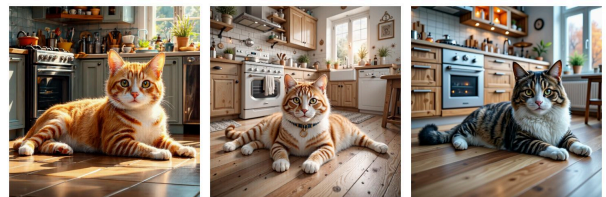

A cat laying on the floor of a kitchen.

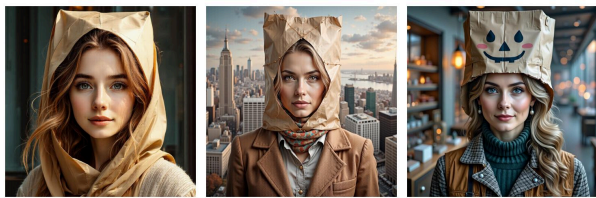

A portrait of a woman with a paper bag over her head.

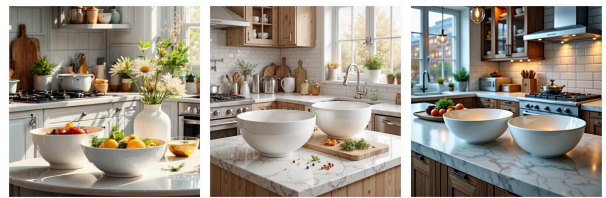

A kitchen counter top with a white bowl sitting next to another white bowl.

Figure 1. Visualization of different approaches (DanceGRPO - MixGRPO - NeighborGRPO).
